# Supplementary material
Source: Springer Nature journal article supplement (https://www.springermedizin.de/resource/supplementary/12889_2013_5911_MOESM3_ESM.pdf/9496556)

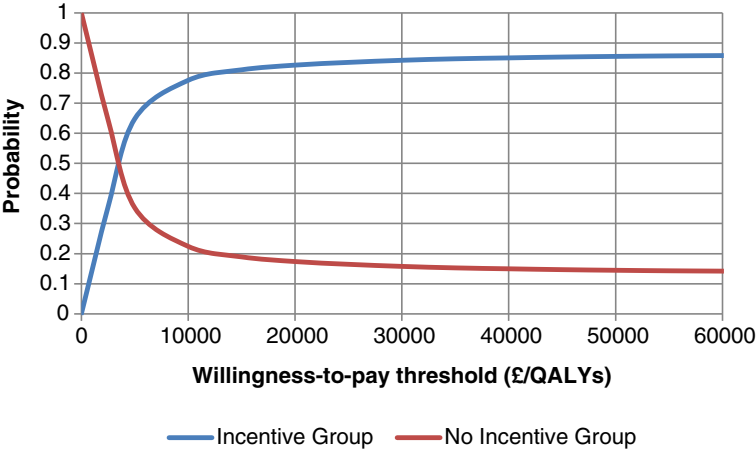

Supplement: MOESM3 [file 9496556]
